# Supplementary material for: Research on Reasoning concerning Emergency Measures for Industrial Project Scheduling Control
Source: Hindawi journal article supplement (doi:10.1155/2021/5595354), 2021-01-01
Supplement: f1 [file 5595354.f1.zip]

Archive with 2 entries (2 files):
- 5595354.f1/S1 Table.docx
- 5595354.f1/S2 Table.docx
