# Supplementary material for: Research on Reasoning concerning Emergency Measures for Industrial Project Scheduling Control
Source: Hindawi journal article supplement (doi:10.1155/2021/5595354), 2021-01-01
Supplement: f1 [file 5595354.f1.zip › 5595354.f1/S1 Table.docx]

**S1 Table**

Feature information for sample industrial project scheduling control cases.

| Case | C*1* | C*2* | *C3* | *C4* | *C5* | *C7* | C*8* | *C9* | *C10* | C*11* | *C12* |
| --- | --- | --- | --- | --- | --- | --- | --- | --- | --- | --- | --- |
| *X1* | 1 | 1 | 2 | 1 | 1 | 2 | 1 | 2 | 4 | 1 | 1 |
| *X2* | 2 | 2 | 1 | 2 | 1 | 1 | 2 | 3 | 2 | 1 | 2 |
| *X3* | 2 | 2 | 3 | 1 | 2 | 2 | 2 | 4 | 1 | 2 | 2 |
| *X4* | 2 | 1 | 1 | 2 | 1 | 4 | 1 | 2 | 2 | 1 | 2 |
| *X5* | 1 | 1 | 3 | 1 | 1 | 3 | 1 | 4 | 4 | 1 | 1 |
| *X6* | 1 | 2 | 2 | 2 | 1 | 3 | 1 | 1 | 2 | 1 | 2 |
| *X7* | 1 | 1 | 2 | 1 | 2 | 3 | 1 | 2 | 3 | 2 | 3 |
| *X8* | 2 | 2 | 1 | 1 | 2 | 2 | 2 | 4 | 1 | 1 | 2 |
| *X9* | 1 | 1 | 2 | 2 | 1 | 3 | 1 | 2 | 4 | 1 | 3 |
| *X10* | 2 | 1 | 3 | 2 | 1 | 2 | 1 | 1 | 2 | 1 | 2 |
| *X11* | 2 | 2 | 1 | 1 | 2 | 2 | 2 | 5 | 1 | 2 | 2 |
| *X12* | 1 | 1 | 2 | 2 | 1 | 4 | 1 | 2 | 2 | 1 | 3 |
| *Y* | 1 | 2 | 2 | 1 | 1 | 3 | 2 | 1 | 2 | 1 | 2 |
