# Supplementary material for: Research on Reasoning concerning Emergency Measures for Industrial Project Scheduling Control
Source: Hindawi journal article supplement (doi:10.1155/2021/5595354), 2021-01-01
Supplement: f1 [file 5595354.f1.zip › 5595354.f1/S2 Table.docx]

**S2 Table**

Matrix similarity for sample industrial project scheduling control cases.

| Case Comparison | Case similarity |
| --- | --- |
| (*X1*,*X2*) | 2 |
| (*X1*,*X3*) | 2 |
| (*X1*,*X4*) | 5 |
| (*X1*,*X5*) | 9 |
| (*X1*,*X6*) | 5 |
| (*X1*,*X7*) | 6 |
| (*X1*,*X8*) | 3 |
| (*X1*,*X9*) | 9 |
| (*X1*,*X10*) | 5 |
| (*X1*,*X11*) | 3 |
| (*X1*,*X12*) | 7 |
| (*X1*,*Y*) | 5 |
| (*X2*,*X3*) | 5 |
| (*X2*,*X4*) | 8 |
| (*X2*,*X5*) | 2 |
| (*X2*,*X6*) | 7 |
| (*X2*,*X7*) | 1 |
| (*X2*,*X8*) | 7 |
| (*X2*,*X9*) | 3 |
| (*X2*,*X10*) | 7 |
| (*X2*,*X11*) | 5 |
| (*X2*,*X12*) | 5 |
| (*X2*,*Y*) | 7 |
| (*X3*,*X4*) | 3 |
| (*X3*,*X5*) | 3 |
| (*X3*,*X6*) | 3 |
| (*X3*,*X7*) | 4 |
| (*X3*,*X8*) | 10 |
| (*X3*,*X9*) | 0 |
| (*X3*,*X10*) | 5 |
| (*X3*,*X11*) | 9 |
| (*X3*,*X12*) | 1 |
| (*X3*,*Y*) | 5 |
| (*X4*,*X5*) | 4 |
| (*X4*,*X6*) | 7 |
| (*X4*,*X7*) | 4 |
| (*X4*,*X8*) | 5 |
| (*X4*,*X9*) | 6 |
| (*X4*,*X10*) | 9 |
| (*X4*,*X11*) | 3 |
| (*X4*,*X12*) | 9 |
| (*X4*,*Y*) | 5 |
| (*X5*,*X6*) | 5 |
| (*X5*,*X7*) | 5 |
| (*X5*,*X8*) | 3 |
| (*X5*,*X9*) | 8 |
| (*X5*,*X10*) | 5 |
| (*X5*,*X11*) | 2 |
| (*X5*,*X12*) | 5 |
| (*X5*,*Y*) | 5 |
| (*X6*,*X7*) | 5 |
| (*X6*,*X8*) | 4 |
| (*X6*,*X9*) | 7 |
| (*X6*,*X10*) | 8 |
| (*X6*,*X11*) | 2 |
| (*X6*,*X12*) | 8 |
| (*X6*,*Y*) | 10 |
| (*X7*,*X8*) | 3 |
| (*X7*,*X9*) | 7 |
| (*X7*,*X10*) | 3 |
| (*X7*,X11) | 3 |
| (*X7*,*X12*) | 7 |
| (*X7*,*Y*) | 5 |
| (*X8*,*X9*) | 1 |
| (*X8*,*X10*) | 5 |
| (*X8*,*X11*) | 9 |
| (*X8*,*X12*) | 2 |
| (*X8*,*Y*) | 6 |
| (*X9*,*X10*) | 5 |
| (*X9*,*X11*) | 1 |
| (*X9*,*X12*) | 9 |
| (*X9*,*Y*) | 5 |
| (*X10*,*X11*) | 3 |
| (*X10*,*X12*) | 7 |
| (*X10*,*Y*) | 6 |
| (*X11*,*X12*) | 0 |
| (*X11*,*Y*) | 4 |
| (*X12*,*Y*) | 6 |
